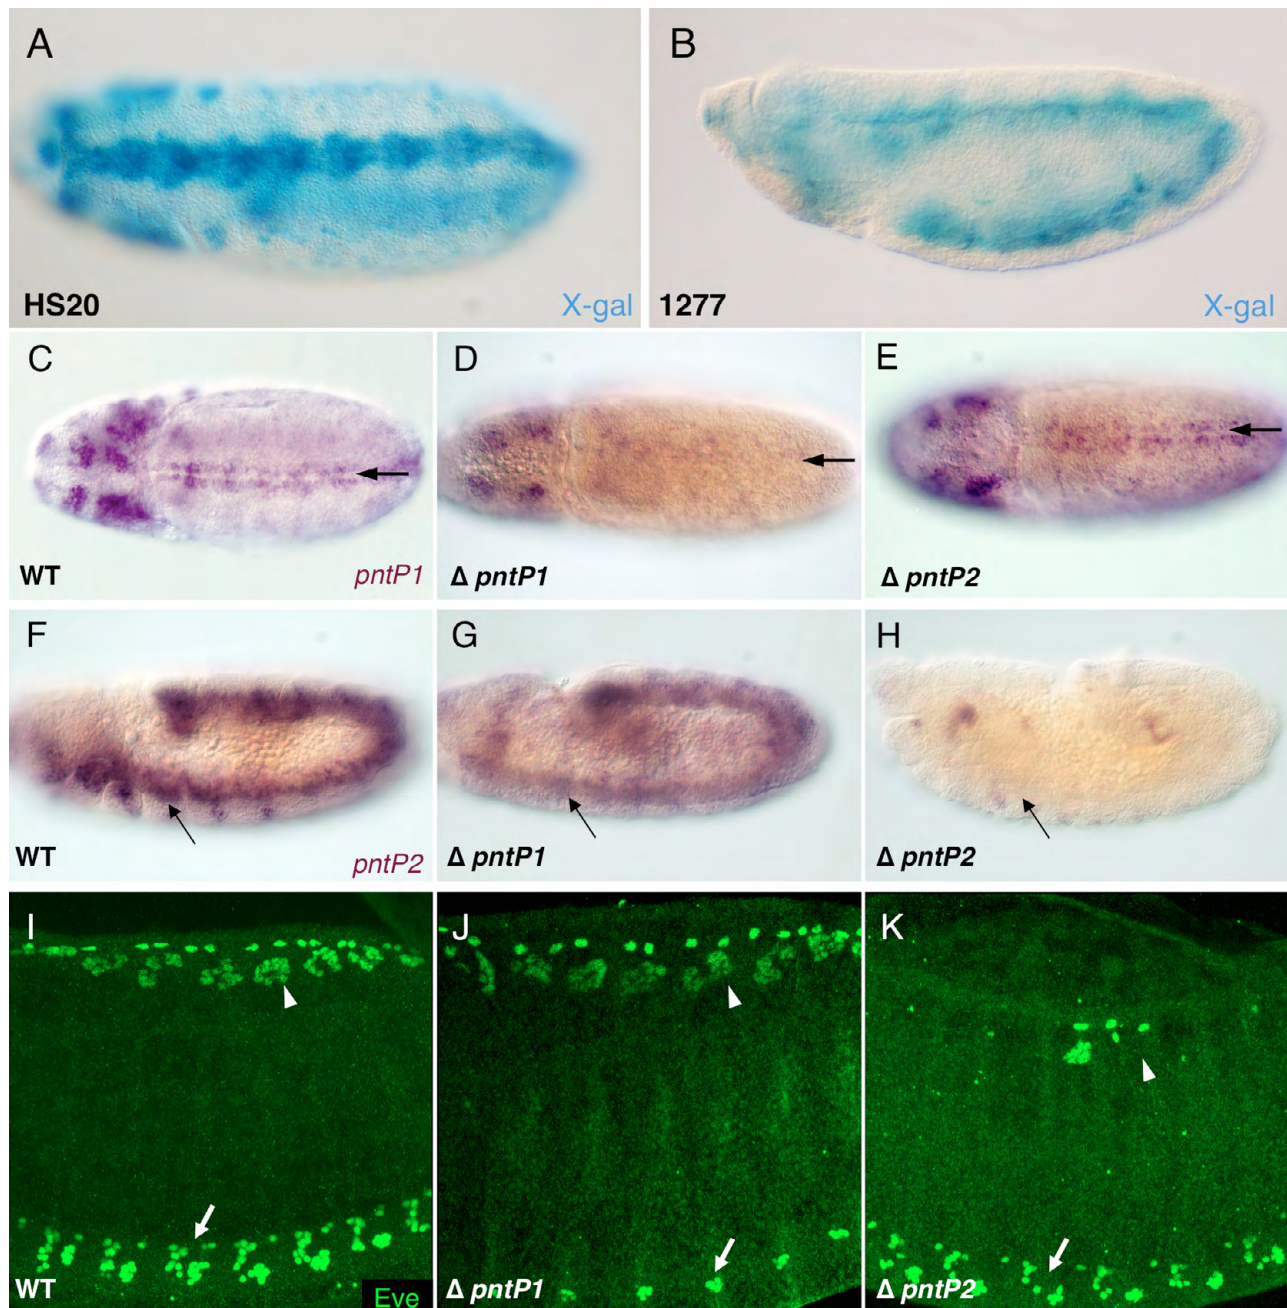

**Fig. S1. HS20 and 1277 faithfully display the expression pattern of each *pnt* form, whereas *pnt*<sup>433</sup> and *pnt*<sup>478</sup> mutants represent specific disruptions of each of the *pnt* transcription units.** (A,B) Expression pattern of the two enhancer traps in stage 10-11 embryos, monitored by X-gal staining. HS20 (*pntP1*) is detected in the ventral ectoderm (A) while 1277 (*pntP2*) is detected in the mesoderm of the embryo (B). (C-E) *In situ* hybridization of a *pntP1*-specific probe to stage 10-11, wild-type (C), mutant *pntP1* (*pnt*<sup>433</sup>) (D) and mutant *pntP2* (*pnt*<sup>478</sup>) (E) embryos. Arrows indicate the ventral midline. A disruption of *pntP1* expression was observed in 23% of the examined embryos ( $n=52$ ) from a cross between *pnt*<sup>433</sup> heterozygotes, but only in 2% of the examined embryos ( $n=86$ ) from a cross between *pnt*<sup>478</sup> heterozygotes. (F-H) *In situ* hybridization of a *pntP2*-specific probe to stage 10-11, wild-type (F), mutant *pntP1* (*pnt*<sup>433</sup>) (G) and mutant *pntP2* (*pnt*<sup>478</sup>) (H) embryos. Arrows indicate the mesoderm. Fewer than 5% of the embryos ( $n=65$ ) from a cross between *pnt*<sup>433</sup> heterozygotes showed abnormality in *pntP2* expression, while expression was strongly reduced or missing in 21% of the examined embryos ( $n=74$ ), from a cross between *pnt*<sup>478</sup> heterozygotes. (I-K) Anti-Eve staining of stage 14 wild-type (I), mutant *pntP1* (*pnt*<sup>433</sup>) (J) and mutant *pntP2* (*pnt*<sup>478</sup>) (K) embryos. Arrowheads indicate DA1 muscle clusters and arrows indicate the CNS. Approximately one quarter of the embryos from a cross between *pnt*<sup>433</sup> heterozygotes ( $n=83$ ) showed a strong reduction in Eve staining of the CNS, while the mesodermally derived DA1 clusters were unaffected (J). Conversely, DA1 cluster staining was nearly absent in approximately one quarter of the embryos from a cross between *pnt*<sup>478</sup> heterozygotes ( $n=120$ ). CNS staining was only weakly affected in these embryos (K).

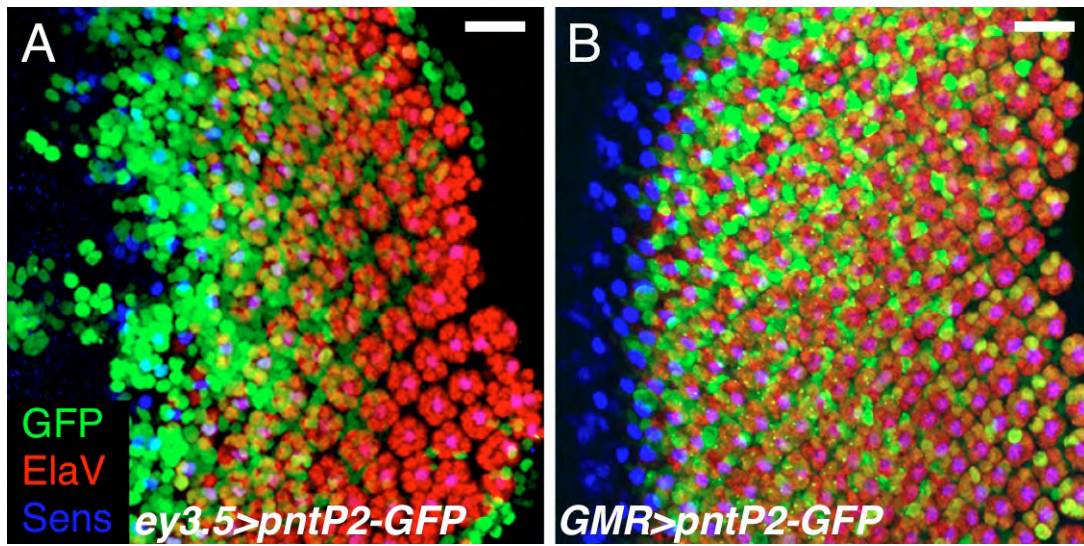

**Fig. S2. The *UAS-PntP2* GFP-tagged construct is robustly expressed.** (A,B) Imaginal eye discs expressing *UAS-pntP2-GFP* via the *ey3.5-Gal4* driver, which is active throughout the eye disc epithelium (A), or via *GMR-Gal4*, which is active posterior to the morphogenetic furrow (B). Photoreceptors are visualized with Elav (red) and R8 photoreceptors with Sens (blue). Visualization of PntP2-GFP using anti-GFP (green) attests to the robust levels of expression obtained using either Gal4 driver.

**Table S1. Parameters used for the graph in Fig. 6A**

| Parameter      | Physical meaning                                                         | Value                                           |
|----------------|--------------------------------------------------------------------------|-------------------------------------------------|
| $\alpha_{Spi}$ | Spi production rate                                                      | $10^{-3} \text{ seconds}^{-1} \mu\text{M}^{-1}$ |
| $\beta_{Spi}$  | Spi degradation rate                                                     | $10^{-2} \text{ seconds}^{-1}$                  |
| $t_0$          | Time when Spi values begin to drop                                       | $10^3 \text{ seconds}$                          |
| $k_{kin}$      | Spi dependent PntP2 phosphorylation rate                                 | $10 \text{ seconds}^{-1} \mu\text{M}^{-1}$      |
| $\tau_p$       | Time for the propagation of the Spi signal until PntP2 is phosphorylated | 15 seconds                                      |
| $k_{phos}$     | pPntP2 dephosphorylation rate                                            | $10^{-1} \text{ seconds}^{-1}$                  |
| $\alpha_{P1}$  | pPntP2-dependent PntP1 production rate                                   | $10^{-2} \text{ seconds}^{-1} \mu\text{M}^{-1}$ |
| $\tau_t$       | Time to produce PntP1 protein following activation by pPntP2             | 900 seconds                                     |
| $\beta_{P1}$   | PntP1 turnover rate                                                      | $1/3600 \text{ seconds}^{-1}$                   |
| $P2_{tot}$     | Total PntP2 levels                                                       | 10 $\mu\text{M}$                                |

The time scales and lag times of phosphorylation and dephosphorylation of PntP2 are much faster than those of PntP1. This reflects the fact that signal transduction and phosphorylation are faster events than protein production and turnover rates.
